# Supplementary material
Source: MDPI journal article supplement (https://www.mdpi.com/2071-1050/13/24/13529)
Supplement: s1 [file s1]

**Table S1.** Shapiro Wilk test showed normal distribution for all the studied parameters.

| Parameters         | Treatments    | Shapiro-Wilk Test |    |       |
|--------------------|---------------|-------------------|----|-------|
|                    |               | Statistic         | df | Sig.  |
| <b>Root length</b> | un-inoculated | 0.963             | 3  | 0.63  |
|                    | Inoculated    | 0.966             | 3  | 0.645 |
| Shoot length       | un-inoculated | 0.993             | 3  | 0.843 |
|                    | Inoculated    | 0.978             | 3  | 0.714 |
| Fresh weight       | un-inoculated | 0.752             | 3  | 0.003 |
|                    | Inoculated    | 0.99              | 3  | 0.809 |
| Dry weight         | un-inoculated | 0.938             | 3  | 0.521 |
|                    | Inoculated    | 0.937             | 3  | 0.516 |
| Chl a              | un-inoculated | 0.859             | 3  | 0.266 |
|                    | Inoculated    | 0.993             | 3  | 0.843 |
| Chl b              | un-inoculated | 0.999             | 3  | 0.935 |
|                    | Inoculated    | 0.952             | 3  | 0.579 |
| Total Chl          | un-inoculated | 0.991             | 3  | 0.82  |
|                    | Inoculated    | 0.876             | 3  | 0.314 |
| ELL                | un-inoculated | 0.983             | 3  | 0.753 |
|                    | Inoculated    | 0.984             | 3  | 0.759 |
| RWC                | un-inoculated | 0.893             | 3  | 0.363 |
|                    | Inoculated    | 0.942             | 3  | 0.537 |
| Proline            | un-inoculated | 0.971             | 3  | 0.674 |
|                    | Inoculated    | 0.944             | 3  | 0.545 |
| MDA                | un-inoculated | 0.834             | 3  | 0.199 |
|                    | Inoculated    | 0.839             | 3  | 0.213 |
| SOD                | un-inoculated | 0.953             | 3  | 0.584 |
|                    | Inoculated    | 0.928             | 3  | 0.48  |
| POD                | un-inoculated | 0.925             | 3  | 0.469 |
|                    | Inoculated    | 0.851             | 3  | 0.243 |
| CAT                | un-inoculated | 0.999             | 3  | 0.948 |
|                    | Inoculated    | 0.987             | 3  | 0.78  |
| Soil               | un-inoculated | 0.948             | 3  | 0.562 |
|                    | Inoculated    | 0.9               | 3  | 0.386 |
| Root               | un-inoculated | 0.939             | 3  | 0.522 |
|                    | Inoculated    | 0.958             | 3  | 0.605 |
| Shoot              | un-inoculated | 0.949             | 3  | 0.567 |
|                    | Inoculated    | 0.864             | 3  | 0.28  |
| TF                 | un-inoculated | 0.94              | 3  | 0.527 |
|                    | Inoculated    | 0.871             | 3  | 0.298 |
| BCF                | un-inoculated | 0.855             | 3  | 0.253 |
|                    | Inoculated    | 0.75              | 3  | 0.263 |

**Table S2.** Analysis of variance revealed highly significant difference for the studied parameters.

| Source       | Treatments | Error | Total | MS        |
|--------------|------------|-------|-------|-----------|
| DF           | 5          | 12    | 17    | -         |
| Root length  | 5          | 12    | 17    | 0.0217**  |
| Shoot length | 5          | 12    | 17    | 0.015**   |
| Fresh weight | 5          | 12    | 17    | 47.0738** |
| Dry weight   | 5          | 12    | 17    | 3.16257** |
| Chl a        | 5          | 12    | 17    | 0.00004** |
| Chl b        | 5          | 12    | 17    | 0.00037** |
| Total Chl    | 5          | 12    | 17    | 0.009**   |
| RWC          | 5          | 12    | 17    | 305.721** |
| ELL          | 5          | 12    | 17    | 57.8499** |
| MDA          | 5          | 12    | 17    | 1.56509** |
| Proline      | 5          | 12    | 17    | 0.00497** |
| SOD          | 5          | 12    | 17    | 6287.92** |
| POD          | 5          | 12    | 17    | 0.54009** |
| Catalase     | 5          | 12    | 17    | 0.20885** |
| Soil         | 5          | 12    | 17    | 18.9819** |
| Root         | 5          | 12    | 17    | 12.4277** |
| Shoot        | 5          | 12    | 17    | 19.2463** |
| TF           | 5          | 12    | 17    | 0.05604** |
| BCF          | 5          | 12    | 17    | 0.00988** |

\*= significant and \*\*= highly significant.

**Table S3.** Antibiotic resistance of *Bacillus anthracis* PM21.

| Antibiotic      | Concentration | Inhibition zone (mm) | Zone diameter |              |           |
|-----------------|---------------|----------------------|---------------|--------------|-----------|
|                 |               |                      | Susceptible   | Intermediate | Resistant |
| Erythromycin    | 15 µg         | 13                   | -             | +            | -         |
| Tobramycin      | 10 µg         | 5                    | -             | -            | +         |
| Tetracycline    | 30 µg         | 12                   | -             | +            | -         |
| Ceftazidime     | 30 µg         | 3                    | -             | -            | +         |
| Lincomycin      | 15 µg         | 3                    | -             | -            | +         |
| Spectinomycin   | 25 µg         | 25                   | -             | -            | -         |
| Kanamycin       | 30 µg         | 6                    | -             | -            | +         |
| Streptomycin    | 10 µg         | 25                   | -             | -            | +         |
| Cloxacillin     | 5 µg          | 5                    | -             | -            | +         |
| Penicillin      | 1 µg          | 6                    | -             | -            | +         |
| Nitrofurantoin  | 300 µg        | 6                    | -             | -            | +         |
| Fosfomycin      | 50 µg         | 5                    | -             | -            | +         |
| Gentamycin      | 10 µg         | 4                    | -             | -            | +         |
| Neomycin        | 10 µg         | 8                    | -             | -            | +         |
| Ciprofloxacin   | 30 µg         | 5                    | -             | -            | +         |
| Chloramphenicol | 30 µg         | 12                   | -             | +            | -         |
| Colistin        | 10 µg         | 3                    | -             | -            | +         |
| Rifampicin      | 5 µg          | 4                    | -             | -            | +         |
| Clindamycin     | 2 µg          | 25                   | +             | -            | -         |
| Piperacillin    | 100 µg        | 6                    | -             | -            | +         |

(+): positive; (-): negative.
